# Supplementary material
Source: HighWire-hosted journal article supplement (https://bmjopen.bmj.com/content/10/9/e036558)
Supplement: inline-supplementary-material-2 [file inline-supplementary-material-2.pdf]

**SUPPLEMENTARY TABLE 1****Table 1 - Search strategies**

| Number | Theme             | Searching terms                                                                                                                                                                                                                                                                                                                                                                                                                                                                                                                                                                                                                                                                                                                                                                                                                                                                                                                                                                                                                               |
|--------|-------------------|-----------------------------------------------------------------------------------------------------------------------------------------------------------------------------------------------------------------------------------------------------------------------------------------------------------------------------------------------------------------------------------------------------------------------------------------------------------------------------------------------------------------------------------------------------------------------------------------------------------------------------------------------------------------------------------------------------------------------------------------------------------------------------------------------------------------------------------------------------------------------------------------------------------------------------------------------------------------------------------------------------------------------------------------------|
| 1      | population        | "health personnel"[Mesh] OR "health personnel" OR "health personnels" OR "health care staff" OR "health care staffs" OR "health care worker" OR "health care workers" OR "health employee" OR "health employees" OR "health staff" OR "health staffs" OR "healthcare staff" OR "healthcare staffs" OR "health care providers" OR "health care provider" OR "healthcare providers" OR "healthcare provider" OR "healthcare providers" OR "healthcare worker" OR "healthcare workers" OR "health care personnel" OR "health care personnels" OR "health care practitioner" OR "health care practitioners" OR "health professional" OR "health professionals" OR "health care professional" OR "health care professionals" OR "health professional personnel" OR "health worker" OR "health workers" OR "healthcare personnel" OR "healthcare personnels" OR "healthcare practitioner" OR "healthcare practitioners" OR "healthcare professional" OR "healthcare professionals" OR "health personnel attitude" OR "attitude of health personnel" |
| 2      | exposures         | "work place violence" OR "lateral violence" OR "horizontal violence" OR "workplace violence"[Mesh] OR "workplace violence" OR "exposure to violence"[Mesh] OR "exposure to violence" OR "violence exposure" OR "experience of violence" OR "occupational violence" OR "physical abuse" [Mesh] OR "physical abuse" OR "physical violence" OR "verbal abuse" OR "verbal abuses" OR "verbal aggression" OR "occupational violence"                                                                                                                                                                                                                                                                                                                                                                                                                                                                                                                                                                                                               |
| 3      | intervention type | "education"[Mesh] OR "education" OR "training" OR "reporting" OR "inservice training"[Mesh] OR "inservice training" OR "intervention*" OR "measures" OR "policy" OR "security" OR "approach" OR "evaluation" OR "avoidance" OR "debriefing" OR "management" OR "program" OR "strategy*" OR "behavior*" OR "administrative interventions" OR "behavior interventions" OR "environment interventions" OR "culture change"                                                                                                                                                                                                                                                                                                                                                                                                                                                                                                                                                                                                                       |
| 4      | search            | #1 AND #2 AND #3                                                                                                                                                                                                                                                                                                                                                                                                                                                                                                                                                                                                                                                                                                                                                                                                                                                                                                                                                                                                                              |
